# Supplementary material
Source: MDPI journal article supplement (https://www.mdpi.com/2073-445X/12/11/2056)
Supplement: s1 [file s1 › land-2612382-supplementary.pdf]

Survey/ Interview:

Name:

Location:

**Questions semi-structured interviews only:**

How long have members of your group been farming at this site?

How long have you been farming at this location?

How large is your groups' site? How many farmers are active?

How many fields do you have? What size are they?

Do you own the fields that you work or do you rent them?

Do you work together as group at this site?

Do all farmers here use the same practices/management?

What other practices have you seen?

Are there practices you would like to use?

**Questions also asked in conversational interviews:**

What do you grow?

Do you always grow this (crop-rotation or intercropping)?

Do you plough your land?

How do you water your crops?

How do you fertilize your fields/ what do you use to fertilize?

What are your challenges farming here?

Is there anything else you would like to tell me about farming here?

---

Clarifying questions

- Can you expand on this?
- Can you tell me anything else?
- Can you give me an example of this?
- Can you walk me through this?
